# Supplementary material for: Biogeography and Systematics of the Genus Axyris (Amaranthaceae s.l.)
Source: MDPI journal article supplement (doi:10.3390/plants11212873), 2022-10-27
Supplement: s1 [file s1]

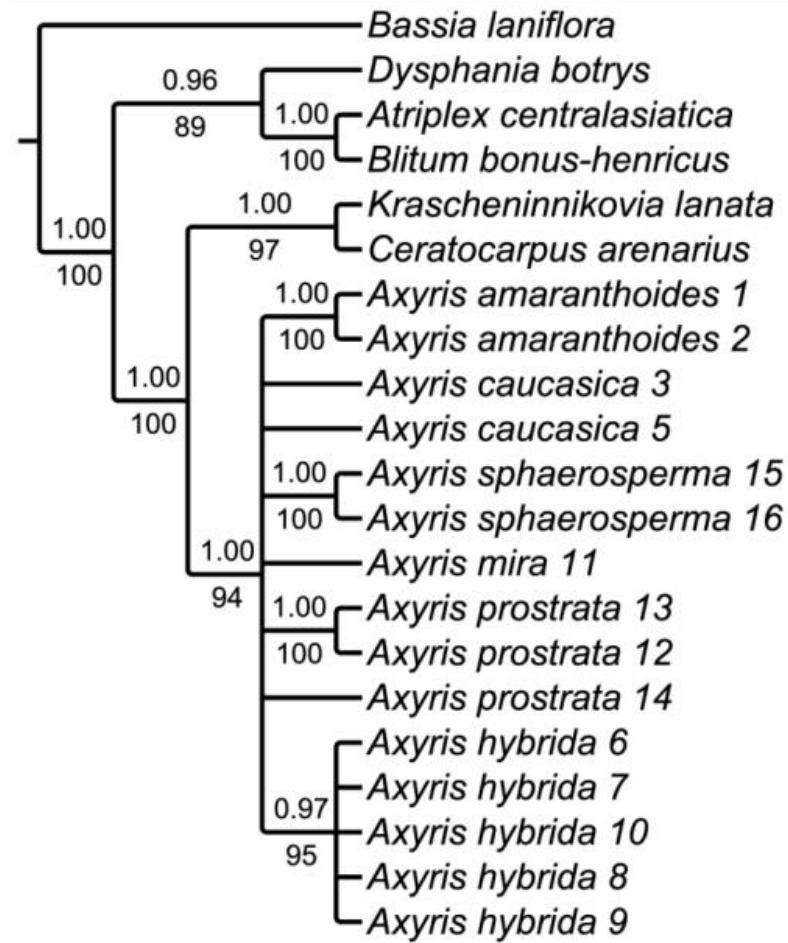

**Figure S1.** The ML phylogenetic cladogram of *Axyris* derived from nrITS. Posterior probabilities resulting from the Bayesian analysis are indicated above branches (only values ≥ 0.9); the numbers below branches refer to bootstrap values resulting from the ML analysis (only values ≥ 70).

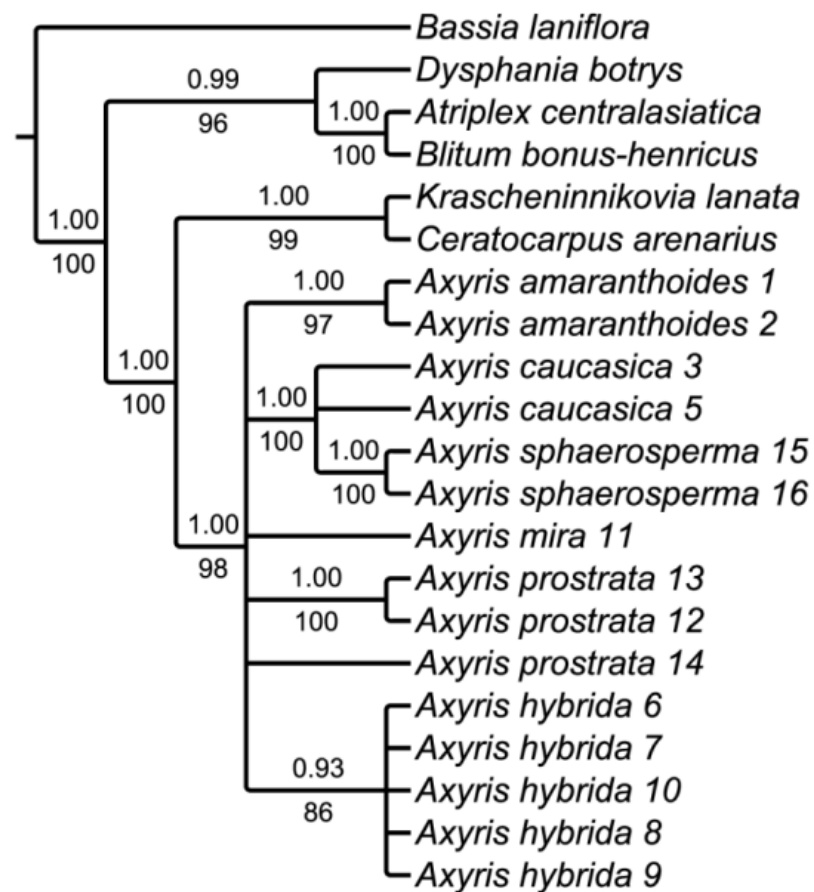

**Figure S2.** The ML phylogenetic cladogram of *Axyris* derived from the combined plastid matrix (rbcL, atpB-rbcL, and trnL-F). Posterior probabilities resulting from the Bayesian analysis are indicated above branches (only values  $\geq 0.9$ ), and the numbers below branches denote bootstrap values resulting from the ML analysis (only values  $\geq 70$ ).
